# Supplementary material
Source: PubMed Central journal article supplement (PMC4874569)
Supplement: NIHMS772716-supplement-1.pdf [file NIHMS772716-supplement-1.pdf]

## Supplemental Data

| Sample  | IgM (ug/ml) | IgG (ug/ml) | IgM (ug) | IgG (ug) | Day of Death |
|---------|-------------|-------------|----------|----------|--------------|
| 3mo #1  | 231         | 51          | 70       | 15       | D8           |
| 3mo #2  | 255         | 14          | 70       | 4        | D14          |
| 3mo #3  | 270         | 0           | 70       | 0        | D14          |
| 3mo #4  | 273         | 0           | 70       | 0        | D8           |
| 3mo #5  | 310         | 0           | 70       | 0        | D4           |
| 3mo #6  | 355         | 0           | 70       | 0        | D6           |
| 3mo #7  | 421         | 0           | 70       | 0        | D5           |
| 3mo #8  | 375         | 0           | 70       | 0        | D5           |
| 3mo #9  | 388         | 0           | 70       | 0        | D5           |
| 3mo #10 | 402         | 0           | 70       | 0        | D6           |
| 3mo #11 | 348         | 38          | 70       | 0        | D7           |
| 3mo #12 | 486         | 0           | 70       | 0        | D14          |
| 3mo #13 | 466         | 0           | 70       | 0        | D4           |
| 3mo #14 | 326         | 0           | 70       | 0        | D14          |
| 3mo #15 | 332         | 0           | 70       | 0        | D4           |
| 3mo #16 | 386         | 0           | 70       | 0        | D14          |

| Sample  | IgM (ug/ml) | IgG (ug/ml) | IgM (ug) | IgG (ug) | Day of Death |
|---------|-------------|-------------|----------|----------|--------------|
| 18mo #1 | 292         | 0           | 70       | 0        | D4           |
| 18mo #2 | 60          | 0           | 60       | 0        | D5           |
| 18mo #3 | 387         | 0           | 70       | 0        | D5           |
| 18mo #4 | 397         | 0           | 70       | 0        | D4           |
| 18mo #5 | 639         | 0           | 70       | 0        | D4           |
| 23mo #1 | 195         | 22          | 70       | 8        | D6           |
| 23mo #2 | 366         | 668         | 70       | 128      | D9           |
| 23mo #3 | 350         | 0           | 70       | 0        | D3           |
| 23mo #4 | 225         | 496         | 70       | 154      | D5           |
| 23mo #5 | 287         | 290         | 70       | 71       | D4           |
| 23mo #6 | 155         | 0           | 70       | 0        | D5           |
| 24mo #1 | 181         | 0           | 70       | 0        | D4           |
| 24mo #2 | 388         | 43          | 70       | 8        | D3           |
| 24mo #3 | 178         | 0           | 70       | 0        | D3           |
| 24mo #4 | 399         | 411         | 70       | 72       | D3           |
| 24mo #5 | 231         | 37          | 70       | 11       | D4           |

Holodick Suppl Figure 1

**Supplemental Figure 1, Related to Figure 1: Ig characteristics from serum samples and corresponding day of death for recipients used in the pneumococcal infection experiment.** All serum samples were obtained from 3, 18, or 23-24-month old male BALB/c-ByJ mice at time of euthanasia. The amount of IgM and IgG post protein G depletion is shown ( $\mu\text{g/ml}$ ). The amount ( $\mu\text{g}$ ) of serum IgM and remaining IgG (if present) injected into each animal is shown. The day post injection the animal succumbed to infection is also indicated.

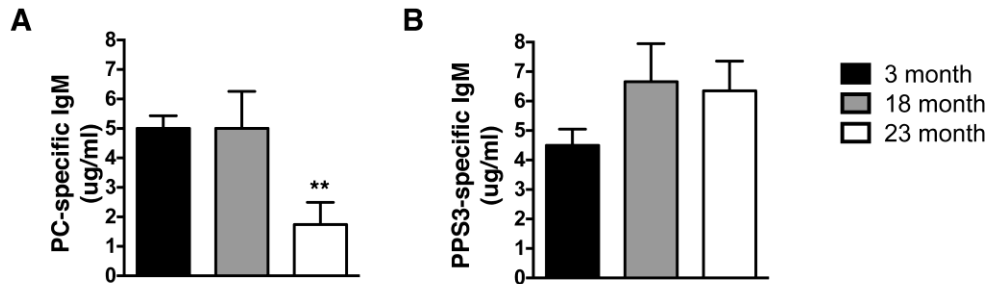

Holodick Supplemental Figure 2

**Supplemental Figure 2, Related to Figure 2: Serum levels of anti-PC and anti-PPS3 specific IgM from aged and young mice.** Serum was collected from 3 (n=9), 18 (n=5), 23-month (n=6) old BALB/c-ByJ mice at time of euthanasia. Serum samples were analyzed for **(A)** PC-specific IgM, and **(B)** PPS3-specific IgM. Black bars represent 3-month old mice, grey bars represent 18-month old mice, and white bars represent 23-month old mice. Values are displayed as the mean ( $\pm$ SEM) of individual mouse serum samples. Statistics were performed using unpaired, two-tailed student's t-test. PC-specific IgM: 3-month vs. 23-month  $p=0.001$ .

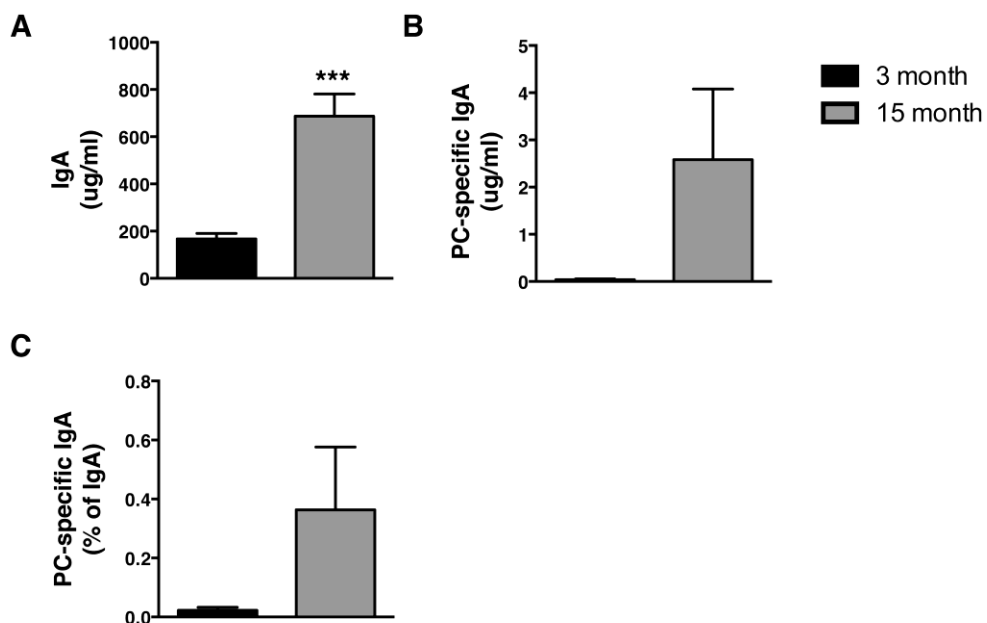

Holodick Supplemental Figure 3

**Supplemental Figure 3: Serum levels of total IgA and anti-PC specific IgA from aged and young mice.** Serum was collected from 3 (n=5) and 15-month (n=3) old BALB/c-ByJ mice at time of euthanasia. Serum samples were analyzed for **(A)** total IgA, and **(B)** PC-specific IgA. **(C)** The total amount of PC-specific IgA was normalized as a percent of total IgA in each sample. Black bars represent 3-month old mice and grey bars represent 15-month old mice. Values are displayed as the mean ( $\pm$ SEM) of individual mouse serum samples. Statistics were performed using unpaired, two-tailed student's t-test. Total IgA: 3-month vs. 15-month  $p=0.0004$ . PC-specific IgA: 3-month vs. 15-month  $p=0.06$ .

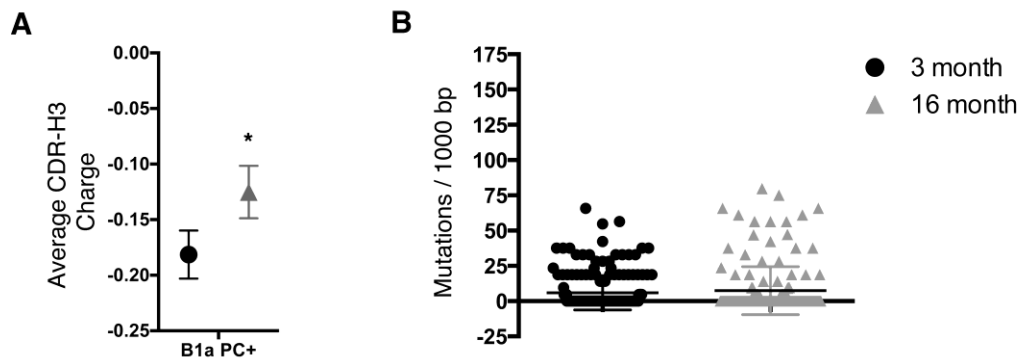

Holodick Supplemental Figure 4

**Supplemental Figure 4, Related to Figure 3: Hydrophobicity and mutational analysis of PC+ peritoneal B-1a cell IgM from 3- and 16-month old mice.** PC+ peritoneal B-1a cells were single cell sorted from 3 and 16-month old (as indicated) male BALB/c-ByJ mice. The VH region was amplified and sequenced as detailed in the Materials and Methods section. **(A)** The average charge of the CDR-H3 loop region of IgM from peritoneal B-1a cells from 3-month (black circles) and 16-month old mice (grey triangles) is shown ( $p=0.04$ , Mann-Whitney test, two-tailed). **(B)** The average mutational rate (mutations per 1000 base pairs) is 5.9 in IgM from 3-month old mice and 7.4 in IgM from 16-month old mice. Values are displayed as the mean ( $\pm$ SEM).

| Age of BALB/c-ByJ (months) | Number of N-Additions at both junctions in IgM from peritoneal B-1a cells (% of sequences) |                       |            |                       | Total number of sequences |
|----------------------------|--------------------------------------------------------------------------------------------|-----------------------|------------|-----------------------|---------------------------|
|                            | 0 at both                                                                                  | 0 at V-D<br>≥1 at D-J | ≥1 at both | 0 at D-J<br>≥1 at V-D |                           |
| 3                          | 46                                                                                         | 8                     | 23         | 22                    | 157                       |
| 7-12                       | 27                                                                                         | 21                    | 35         | 18                    | 197                       |
| 18-24                      | 32                                                                                         | 14                    | 34         | 20                    | 76                        |
| 7-24                       | 28                                                                                         | 19                    | 34         | 18                    | 273                       |

Holodick Supplemental Figure 5

**Supplemental Figure 5, Related to Figure 4:** N-region addition analysis of IgM from peritoneal B-1a cells obtained from aged and young adult mice. Peritoneal B-1a cells were single cell sorted from 3, 7, 9, 10, 12, 18, 23, and 24-month old BALB/c-ByJ mice. The VH region was amplified and sequenced as detailed in the Materials and Methods section. The percent of sequences with zero N-additions at both junctions, one or more N-additions at both junctions, zero N-additions at V-D and 1 or more at D-J junctions, or zero N-additions at D-J and 1 or more at V-D junctions is shown. Chi-square analysis of the junctions (0 at both, 0 at V-D, ≥1 at both, and 0 at D-J) with 2 populations (4 x 2 Chi-square analysis): 3-month vs 7-12month  $p < 0.0001$ ; 3-month vs 18-24month  $p = 0.06$ ; 3-month vs 7-24month  $p < 0.0001$ .

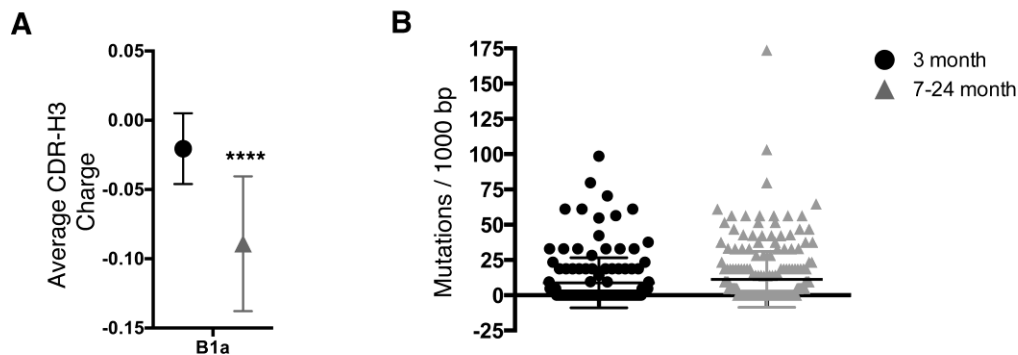

Holodick Supplemental Figure 6

**Supplemental Figure 6, Related to Figure 4: Hydrophobicity and mutational analysis of peritoneal B-1a cell IgM from 3- and 7-24-month old mice.** B-1a cells were single cell sorted from 3, 7, 9, 10, 12, 18, 23, and 24-month old BALB/c-ByJ mice. The  $V_H$  region was amplified and sequenced as detailed in the Materials and Methods section. **(A)** The average charge of the CDR-H3 loop region of IgM from peritoneal B-1a cells from 3-month (black circles) and 7-24 month old mice (grey triangles) is shown ( $p < 0.0001$ , Mann-Whitney test, two-tailed). **(B)** The average mutational rate (mutations per 1000 base pairs) is 8.8 in IgM from 3-month old mice and 11.2 in IgM from 7-24-month old mice ( $p = 0.01$ , Mann-Whitney test, two-tailed). Values are displayed as the mean ( $\pm$ SEM).

**Accession Numbers for  
3-month peritoneal B-1a cells**

KU927047 KU927096 KU927145 KU927194  
KU927048 KU927097 KU927146 KU927195  
KU927049 KU927098 KU927147 KU927196  
KU927050 KU927099 KU927148 KU927197  
KU927051 KU927100 KU927149 KU927198  
KU927052 KU927101 KU927150 KU927199  
KU927053 KU927102 KU927151 KU927200  
KU927054 KU927103 KU927152 KU927201  
KU927055 KU927104 KU927153 KU927202  
KU927056 KU927105 KU927154 KU927203  
KU927057 KU927106 KU927155 KU927204  
KU927058 KU927107 KU927156 KU927205  
KU927059 KU927108 KU927157 KU927206  
KU927060 KU927109 KU927158  
KU927061 KU927110 KU927159  
KU927062 KU927111 KU927160  
KU927063 KU927112 KU927161  
KU927064 KU927113 KU927162  
KU927065 KU927114 KU927163  
KU927066 KU927115 KU927164  
KU927067 KU927116 KU927165  
KU927068 KU927117 KU927166  
KU927069 KU927118 KU927167  
KU927070 KU927119 KU927168  
KU927071 KU927120 KU927169  
KU927072 KU927121 KU927170  
KU927073 KU927122 KU927171  
KU927074 KU927123 KU927172  
KU927075 KU927124 KU927173  
KU927076 KU927125 KU927174  
KU927077 KU927126 KU927175  
KU927078 KU927127 KU927176  
KU927079 KU927128 KU927177  
KU927080 KU927129 KU927178  
KU927081 KU927130 KU927179  
KU927082 KU927131 KU927180  
KU927083 KU927132 KU927181  
KU927084 KU927133 KU927182  
KU927085 KU927134 KU927183  
KU927086 KU927135 KU927184  
KU927087 KU927136 KU927185  
KU927088 KU927137 KU927186  
KU927089 KU927138 KU927187  
KU927090 KU927139 KU927188  
KU927091 KU927140 KU927189  
KU927092 KU927141 KU927190  
KU927093 KU927142 KU927191  
KU927094 KU927143 KU927192  
KU927095 KU927144 KU927193

**Accession Numbers for  
7-24-month peritoneal B-1a cells**

KU927207 KU927256 KU927305 KU927354 KU927403 KU927452  
KU927208 KU927257 KU927306 KU927355 KU927404 KU927453  
KU927209 KU927258 KU927307 KU927356 KU927405 KU927454  
KU927210 KU927259 KU927308 KU927357 KU927406 KU927455  
KU927211 KU927260 KU927309 KU927358 KU927407 KU927456  
KU927212 KU927261 KU927310 KU927359 KU927408 KU927457  
KU927213 KU927262 KU927311 KU927360 KU927409 KU927458  
KU927214 KU927263 KU927312 KU927361 KU927410 KU927459  
KU927215 KU927264 KU927313 KU927362 KU927411 KU927460  
KU927216 KU927265 KU927314 KU927363 KU927412 KU927461  
KU927217 KU927266 KU927315 KU927364 KU927413 KU927462  
KU927218 KU927267 KU927316 KU927365 KU927414 KU927463  
KU927219 KU927268 KU927317 KU927366 KU927415 KU927464  
KU927220 KU927269 KU927318 KU927367 KU927416 KU927465  
KU927221 KU927270 KU927319 KU927368 KU927417 KU927466  
KU927222 KU927271 KU927320 KU927369 KU927418 KU927467  
KU927223 KU927272 KU927321 KU927370 KU927419 KU927468  
KU927224 KU927273 KU927322 KU927371 KU927420 KU927469  
KU927225 KU927274 KU927323 KU927372 KU927421 KU927470  
KU927226 KU927275 KU927324 KU927373 KU927422 KU927471  
KU927227 KU927276 KU927325 KU927374 KU927423 KU927472  
KU927228 KU927277 KU927326 KU927375 KU927424 KU927473  
KU927229 KU927278 KU927327 KU927376 KU927425 KU927474  
KU927230 KU927279 KU927328 KU927377 KU927426 KU927475  
KU927231 KU927280 KU927329 KU927378 KU927427 KU927476  
KU927232 KU927281 KU927330 KU927379 KU927428 KU927477  
KU927233 KU927282 KU927331 KU927380 KU927429 KU927478  
KU927234 KU927283 KU927332 KU927381 KU927430 KU927479  
KU927235 KU927284 KU927333 KU927382 KU927431 KU927480  
KU927236 KU927285 KU927334 KU927383 KU927432 KU927481  
KU927237 KU927286 KU927335 KU927384 KU927433 KU927482  
KU927238 KU927287 KU927336 KU927385 KU927434 KU927483  
KU927239 KU927288 KU927337 KU927386 KU927435  
KU927240 KU927289 KU927338 KU927387 KU927436  
KU927241 KU927290 KU927339 KU927388 KU927437  
KU927242 KU927291 KU927340 KU927389 KU927438  
KU927243 KU927292 KU927341 KU927390 KU927439  
KU927244 KU927293 KU927342 KU927391 KU927440  
KU927245 KU927294 KU927343 KU927392 KU927441  
KU927246 KU927295 KU927344 KU927393 KU927442  
KU927247 KU927296 KU927345 KU927394 KU927443  
KU927248 KU927297 KU927346 KU927395 KU927444  
KU927249 KU927298 KU927347 KU927396 KU927445  
KU927250 KU927299 KU927348 KU927397 KU927446  
KU927251 KU927300 KU927349 KU927398 KU927447  
KU927252 KU927301 KU927350 KU927399 KU927448  
KU927253 KU927302 KU927351 KU927400 KU927449  
KU927254 KU927303 KU927352 KU927401 KU927450  
KU927255 KU927304 KU927353 KU927402 KU927451

**Supplemental Figure 7. GenBank accession numbers for B-1a Cell sequence data.** Sequencing data was deposited into NCBI's Genbank (<http://www.ncbi.nlm.nih.gov/genbank/>). The accession numbers for the sequences are listed.
